# Supplementary material for: Regioselective living polymerization of allylcyclohexane and precise synthesis of hydrocarbon block copolymers with cyclic units
Source: Royal Society of Chemistry journal article supplement (doi:10.1039/c8py00047f), 2018-01-01
Supplement: c8py00047f1.pdf [file c8py00047f1.pdf]

# Electronic Supporting Information

## Regioselective Living Polymerization of Allylcyclohexane and Precise Synthesis of Hydrocarbon Block Copolymers with Cyclic Units

Jie Gao, Zonghang Ying, Liu Zhong, Heng Liao, Haiyang Gao\*, and Qing Wu

School of Materials Science and Engineering, PCFM Lab, Sun Yat-Sen University,  
Guangzhou 510275, China

Corresponding author: Haiyang Gao, E-mail: [gaohy@mail.sysu.edu.cn](mailto:gaohy@mail.sysu.edu.cn)

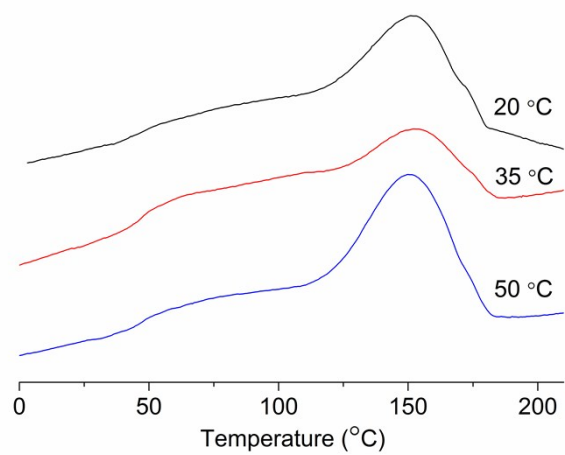

**Figure S1.** DSC curves of PACH produced by 1/Et<sub>2</sub>AlCl at different temperatures.

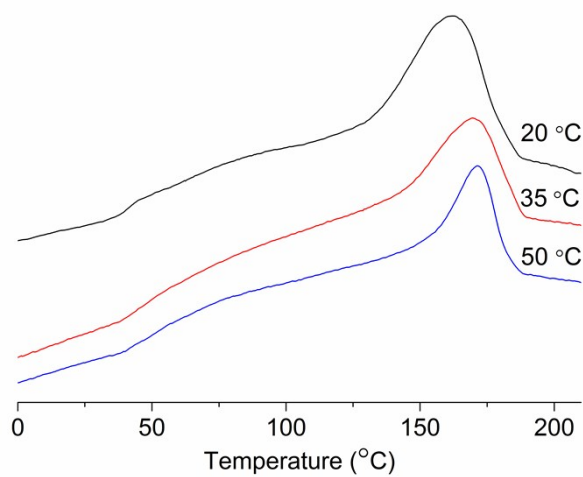

**Figure S2.** DSC curves of PACH produced by 1/MMAO at different temperatures.

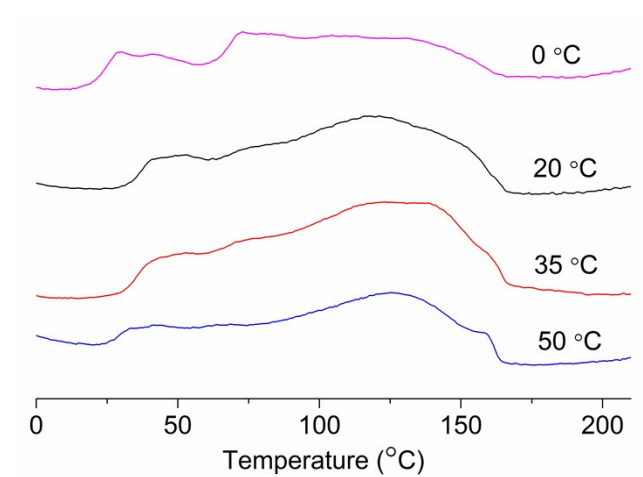

**Figure S3.** DSC curves of PACH produced by **2**/Et<sub>2</sub>AlCl at different temperatures.

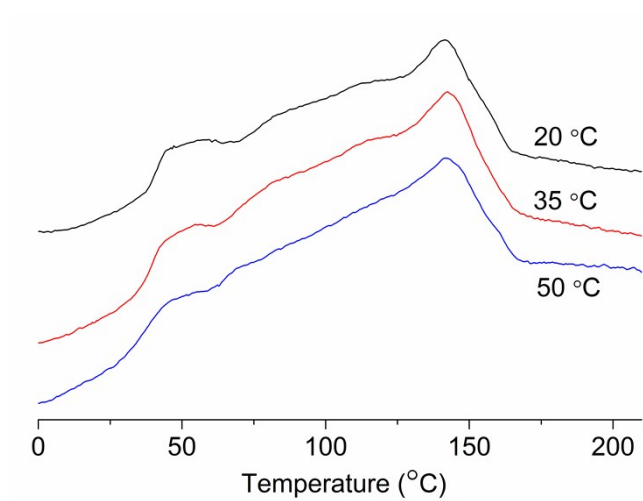

**Figure S4.** DSC curves of PACH produced by **2**/MMAO at different temperatures.

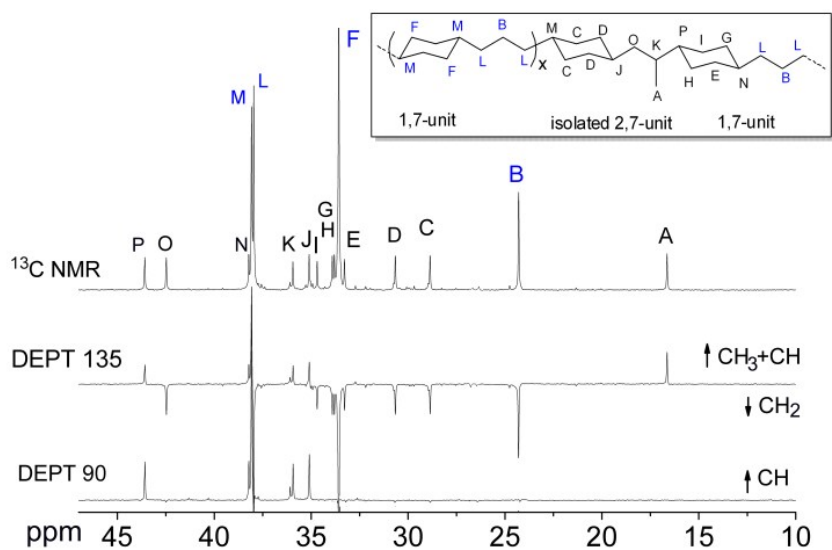

**Table S1.** Chemical shift assignments of  $^{13}\text{C}$  NMR spectra of PACH.

| Peak | DEPT | Chemical shift (ppm) | Assignment    | References |
|------|------|----------------------|---------------|------------|
| A    | P    | 16.64                | $\text{CH}_3$ | (1)        |
| B    | S    | 24.30                | $\text{CH}_2$ | (2)        |
| C    | S    | 28.87                | $\text{CH}_2$ | (3,4)      |
| D    | S    | 30.66                | $\text{CH}_2$ | (3,4)      |
| E    | S    | 33.29                | $\text{CH}_2$ | (2,3)      |
| F    | S    | 33.58                | $\text{CH}_2$ | (2)        |
| G    | S    | 33.81                | $\text{CH}_2$ | (2,3)      |
| H    | S    | 33.91                | $\text{CH}_2$ | (2,3)      |
| I    | S    | 34.70                | $\text{CH}_2$ | (2,3)      |
| J    | T    | 35.10                | CH            | (2,4)      |
| K    | T    | 36.10                | CH            | (2,3)      |
| L    | S    | 37.97                | $\text{CH}_2$ | (2)        |
| M    | T    | 38.08                | CH            | (2)        |
| N    | T    | 38.22                | CH            | (3,4)      |
| O    | S    | 42.48                | $\text{CH}_2$ | (1,4)      |
| P    | T    | 43.59                | CH            | (3,4)      |

The assignments of chemical shifts are referenced to the report in *Anal. Chem.* **1971**, *43*, 1245.

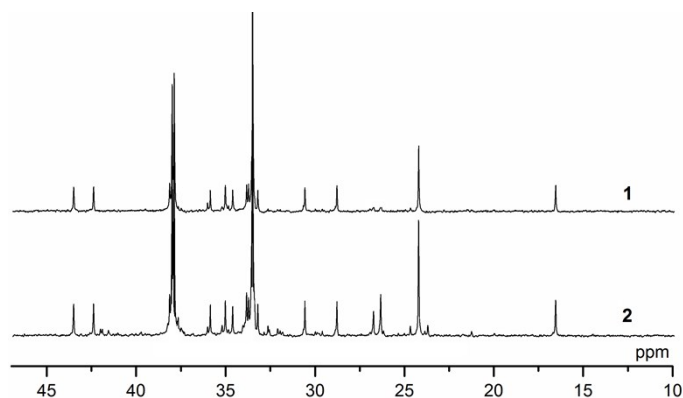

**Figure S5.**  $^{13}\text{C}$  NMR spectra of PACH produced by catalysts **1** (entry 2) and **2** (entry 10).

**Table S2.** Allylcyclohexane living polymerization results at different times catalyzed by **1**/ $\text{Et}_2\text{AlCl}$  at 20 °C.<sup>a</sup>

| Entry | Time (h) | Conv. (%) | $M_n^b$ (kg/mol) | PDI <sup>b</sup> |
|-------|----------|-----------|------------------|------------------|
| 1     | 0.5      | 32.3      | 6.2              | 1.18             |
| 2     | 1        | 45.7      | 9.1              | 1.16             |
| 3     | 1.5      | 62.7      | 12.9             | 1.15             |
| 4     | 2        | 70.3      | 14.1             | 1.15             |
| 5     | 3        | 76.6      | 15.9             | 1.15             |
| 6     | 6        | 86.0      | 17.3             | 1.15             |

<sup>a</sup> Polymerization conditions: 20  $\mu\text{mol}$  Ni, 1 mmol ACH, Al/Ni = 200, 8 mL toluene and 2 mL  $\text{CH}_2\text{Cl}_2$ . <sup>b</sup> Determined by GPC in 1,2,4-trichlorobenzene at 150 °C.

## References

- (1) McCord, E. F.; McLain, S. J.; Nelson, L. T. J.; Ittel, S. D.; Tempel, D. J.; Killian, C. M.; Johnson, L. K.; Brookhart, M.  $^{13}\text{C}$  NMR Analysis of  $\alpha$ -Olefin Enchainment in Poly( $\alpha$ -olefins) Produced with Nickel and Palladium  $\alpha$ -Diimine Catalysts. *Macromolecules* **2007**, *40*, 410-420.
- (2) Takeuchi, D. Precise Isomerization Polymerization of Alkenylcyclohexanes: Stereoregular Polymers Containing Six-membered Rings along the Polymer Chain. *J. Am. Chem. Soc.* **2011**, *133*, 11106-11109.
- (3) Thuilliez, J.; Ricard, L.; Nief, F.; Boisson, F.; Boisson, C. Ansa-bis(fluorenyl)neodymium Catalysts for Cyclocopolymerization of Ethylene with Butadiene. *Macromolecules* **2009**, *42*, 3774.
- (4) Silva, L. C.; Wagener, K. B. Synthesis and Thermal Characterization of Precision Poly(*p*-cyclohexylene alkylene)s via Acyclic Diene Metathesis Polycondensation.

*Macromol. Chem. Phys.* **2016**, *217*, 850-855.
